# Supplementary material
Source: PubMed Central journal article supplement (PMC5850091)
Supplement: ab7b00647_si_001.pdf [file ab7b00647_si_001.pdf]

## **Supplementary Information**

### **Isolation and identification of proteins secreted by cells cultured within synthetic hydrogel-based matrices**

Lisa A. Sawicki, Leila H. Choe, Katherine L. Wiley, Kelvin H. Lee, & April M. Kloxin

**Number of pages: 4**

**Table S1: Complete list of proteins identified by shotgun proteomics.**

**Table S2: List of unnamed or hypothetical proteins identified by BLAST search.**

**Table S1: Complete list of proteins identified by shotgun proteomics.** Large proteins isolated from decellularized samples were identified, with high confidence (>95%) specified for database searches. Accession numbers of unnamed and hypothetical proteins were BLAST searched and matches were identified (Supplementary Table 2).

| Sample Number | Accession Number | Protein Name                                   |
|---------------|------------------|------------------------------------------------|
| 1             | gi 4502027       | serum albumin preproprotein                    |
| 1             | gi 23307793      | serum albumin                                  |
| 1             | gi 189054552     | unnamed protein product                        |
| 1             | gi 119626071     | albumin, isoform CRA_h                         |
| 2             | gi 31874109      | hypothetical protein                           |
| 3             | gi 62896523      | vimentin variant                               |
| 3             | gi 340219        | vimentin                                       |
| 3             | gi 21757045      | unnamed protein product                        |
| 3             | gi 167887751     | vimentin variant 3                             |
| 3             | gi 16552261      | unnamed protein product                        |
| 4             | gi 55743106      | collagen alpha-3(VI) chain isoform 5 precursor |
| 4             | gi 55743098      | collagen alpha-3(VI) chain isoform 1 precursor |
| 4             | gi 530371361     | collagen alpha-3(VI) chain isoform X2          |
| 4             | gi 530371359     | collagen alpha-3(VI) chain isoform X1          |
| 4             | gi 240255535     | collagen alpha-3(VI) chain isoform 4 precursor |
| 4             | gi 219841772     | COL6A3 protein                                 |
| 4             | gi 219521324     | COL6A3 protein                                 |
| 4             | gi 119591516     | collagen, type VI, alpha 3, isoform CRA_h      |
| 4             | gi 119591513     | collagen, type VI, alpha 3, isoform CRA_e      |
| 4             | gi 119591511     | collagen, type VI, alpha 3, isoform CRA_c      |
| 5             | gi 49457374      | HIST1H4F                                       |
| 5             | gi 45767731      | HIST1H4I protein                               |
| 5             | gi 119575948     | histone 1, H4e                                 |
| 5             | gi 119575932     | histone 1, H4c                                 |
| 6             | gi 62897625      | beta actin variant                             |
| 7             | gi 73909156      | Annexin A2                                     |
| 7             | gi 34364597      | hypothetical protein                           |
| 7             | gi 18645167      | Annexin A2                                     |
| 8             | gi 62087582      | H2A histone family, member V isoform 1 variant |

|    |              |                                                                      |
|----|--------------|----------------------------------------------------------------------|
| 9  | gi 73762521  | delta-globin Troodos variant                                         |
| 9  | gi 71727231  | beta globin                                                          |
| 9  | gi 6003534   | hemoglobin beta subunit variant                                      |
| 9  | gi 6003532   | hemoglobin beta subunit variant                                      |
| 9  | gi 4504349   | hemoglobin subunit beta                                              |
| 9  | gi 4378804   | hemoglobin beta chain                                                |
| 9  | gi 40886941  | hemoglobin beta                                                      |
| 9  | gi 29446     | unnamed protein product                                              |
| 9  | gi 26892090  | beta globin chain variant                                            |
| 9  | gi 256028940 | beta-globin                                                          |
| 9  | gi 187940241 | hemoglobin beta chain variant                                        |
| 9  | gi 18462105  | delta-globin                                                         |
| 9  | gi 18418633  | mutant beta-globin                                                   |
| 9  | gi 179409    | beta-globin                                                          |
| 9  | gi 13549112  | beta globin chain variant                                            |
| 10 | gi 87196339  | collagen alpha-1(VI) chain precursor                                 |
| 11 | gi 49456871  | TUBB                                                                 |
| 11 | gi 332246227 | tubulin beta-2B chain isoform 2                                      |
| 11 | gi 27227551  | class II beta tubulin isotype                                        |
| 11 | gi 189069169 | unnamed protein product                                              |
| 14 | gi 189053217 | unnamed protein product                                              |
| 15 | gi 156104889 | protein AF-9 isoform a                                               |
| 16 | gi 21739834  | hypothetical protein                                                 |
| 17 | gi 258690785 | estrogen receptor alpha<br>3*,4,5,6,7,8*/1068 isoform, partial       |
| 18 | gi 68533107  | MYH10 variant protein                                                |
| 18 | gi 641958    | non-muscle myosin B                                                  |
| 18 | gi 530410345 | myosin-10 isoform X3                                                 |
| 18 | gi 530410343 | myosin-10 isoform X2                                                 |
| 18 | gi 367460090 | myosin-10 isoform 3                                                  |
| 18 | gi 367460087 | myosin-10 isoform 2                                                  |
| 18 | gi 119610456 | myosin, heavy polypeptide 10, non-<br>muscle, isoform CRA_c, partial |
| 18 | gi 109734611 | Myosin, heavy chain 10, non-<br>muscle                               |
| 19 | gi 2330597   | MHC class I antigen                                                  |
| 20 | gi 74099694; | sulfite oxidase, mitochondrial                                       |
| 20 | gi 530400755 | sulfite oxidase, mitochondrial<br>isoform X1                         |

**Table S2: List of unnamed or hypothetical proteins identified by BLAST search.** Accession numbers of unnamed and hypothetical proteins were BLAST searched and the top five hits for searches are reported above. Sample numbers 1, 3, 7, 9, 11, which had other top hits identified with shotgun analysis, were confirmed by BLAST search. Samples 2, 14, and 16, which did not have other hits identified with shotgun analysis were identified as fibronectin, peroxiredoxin, and AP-5, respectively.

| Sample Number | Accession Number | Accession Number, Protein Name                                                                                                                                                                                                                                                                              |
|---------------|------------------|-------------------------------------------------------------------------------------------------------------------------------------------------------------------------------------------------------------------------------------------------------------------------------------------------------------|
| 1             | gi 189054552     | gi 4502027, serum albumin preproprotein<br>gi 28592, serum albumin<br>gi 23307793, serum albumin<br>gi 6013427, serum albumin precursor<br>gi 28590, unnamed protein product                                                                                                                                |
| 2             | gi 31874109      | gi 34364820, hypothetical protein<br>gi 119590949, fibronectin 1, isoform CRA_n<br>gi 16933542, fibronectin isoform 3 preproprotein<br>gi 119590945, fibronectin 1, isoform CRA_j<br>gi 530370043, fibronectin isoform X9                                                                                   |
| 3             | gi 21757045      | gi 62414289, vimentin<br>gi 62896523, vimentin variant<br>gi 340219, vimentin<br>gi 47115317, VIM<br>gi 167887751, vimentin variant 3                                                                                                                                                                       |
| 7             | gi 34364597      | gi 50845388, annexin A2 isoform 1<br>gi 73909156, Annexin A2<br>gi 4757756, annexin A2 isoform 2<br>gi 18645167, Annexin A2<br>gi 16306978, Annexin A2                                                                                                                                                      |
| 9             | gi 29446         | gi 23268449, hemoglobin beta chain variant Hb S-Wake<br>gi 71727231, beta globin<br>gi 4504349, hemoglobin subunit beta<br>gi 229959, Chain B, Refined Crystal Structure of Deoxyhemoglobin S. I. Restrained Least-Squares Refinement at 3.0-Angstroms Resolution<br>gi 26892090, beta globin chain variant |
| 11            | gi 189069169     | gi 4507729, tubulin beta-2A chain isoform 1<br>gi 27227551, class II beta tubulin isotype<br>gi 21746161, tubulin beta-2B chain                                                                                                                                                                             |

|    |              |                                                                                                                                                                                                                                                                                                                                   |
|----|--------------|-----------------------------------------------------------------------------------------------------------------------------------------------------------------------------------------------------------------------------------------------------------------------------------------------------------------------------------|
|    |              | gi 49456871, TUBB<br>gi 223486, tubulin beta                                                                                                                                                                                                                                                                                      |
| 14 | gi 189053217 | gi 4505591, peroxiredoxin-1<br>gi 973743966, Chain A, Human Peroxiredoxin-1 C83s Mutant<br>gi 164519504, Chain A, Crystal Structure of Human Peroxiredoxin I In Complex With Sulfiredoxin<br>gi 440306, enhancer protein<br>gi 260656338, Chain A, Crystal Structure of Sulfiredoxin In Complex with Peroxiredoxin I And Atp:mg2+ |
| 16 | gi 21739834  | gi 379317153, AP-5 complex subunit beta-1<br>gi 119594844, DKFZp761E198 protein, isoform CRA_b<br>gi 10732604, unknown<br>gi 114325483, DKFZp761E198 protein<br>gi 119594843, DKFZp761E198 protein, isoform CRA_a                                                                                                                 |
